# Supplementary material for: Non-canonical transcriptional regulation of the poor prognostic factor UGT2B17 in chronic lymphocytic leukemic and normal B cells
Source: Springer Nature journal article supplement (doi:10.1186/s12885-024-12143-7), 2024-04-02
Supplement: MOESM1 [file 26934504]

## **Non-canonical transcriptional regulation of the poor prognostic factor UGT2B17 in chronic lymphocytic leukemic and normal B cells**

Michèle Rouleau<sup>1,2</sup>, Lyne Villeneuve<sup>1,2</sup>, Eric P. Allain<sup>3</sup>, Jules McCabe-Leroux<sup>1,2</sup>, Sophie Tremblay<sup>1,2</sup>, Flora Nguyen Van Long<sup>1,2</sup>, Ashwini Uchil<sup>1,2</sup>, Charles Joly-Beauparlant<sup>2,4</sup>, Arnaud Droit<sup>2,4</sup>, and Chantal Guillemette<sup>1,2,5</sup>

### **Additional file 1:**

Supplementary Table 1: qPCR primers for UGT2B17 variants

Supplementary Table 2: Mutagenesis oligonucleotides

Supplementary Table 3: EMSA oligonucleotides

Supplementary Table 4: EMSA antibodies

Supplementary Data 1: Sequence of the *UGT2B17* gene locus

Supplementary Figure 1: ATAC-seq signals at the *UGT2B17* gene locus in CLL cases.

Supplementary Figure 2: ATAC-seq and epigenetic marks at the *UGT2B17* gene locus in CLL cases.

Supplementary Figure 3: Screening of active cis-regulatory regions in the P3 promoter of *UGT2B17* alt. transcripts by luciferase assays and mutagenesis.

Supplementary Figure 4: Spearman correlations between expression of NF- $\kappa$ B, STAT3 and IRF target genes and *UGT2B17* in the LL100 collection

Supplementary Figure 5: Full blot images of immunoblots presented in Figure 3A

Supplementary Figure 6: Full blot images of EMSA blots presented in Figure 3B

Supplementary Figure 7: Full blot images of replicate EMSA blots related to Figure 3B

**Supplementary Table 1: qPCR primers for *UGT2B17* variants**

| <b>Oligo name</b> | <b>Sequence 5'-&gt;3'</b> |
|-------------------|---------------------------|
| UGT2B17_F         | TGACTTTTGGTTTCAAGC        |
| UGT2B17_R         | TTCCATTTTCCTTAGGCAA       |
| UGT2B17_n2_F      | TGGCACTTGGAGTCTGGACA      |
| UGT2B17_n2_R      | ACACCAGCACCTTTCCACAA      |
| UGT2B17_n4_F      | TCTTCAAGGGTTCATGTCTCCA    |
| UGT2B17_n4_R      | ACACCAGCACCTTTCCACAA      |
| 36B4_F            | CCCATGTGAAGTCACTGTGC      |
| 36B4_R            | GGTTGTAGATGCTGCCATTG      |

**Supplementary Table 2: Mutagenesis oligonucleotides**

| <b>Oligo name</b>       | <b>Sequence 5'→3'</b>                |
|-------------------------|--------------------------------------|
| Deletions               |                                      |
| pGL3_P3_8734_F          | CATCGGCAATAATTGCTTTAACC              |
| pGL3_P3_8734_R          | ACGCGTAAGAGCTCGGTA                   |
| pGL3_P3_8252_F          | GAAGCCTAACAGTAGGCG                   |
| pGL3_P3_8252_R          | ACGCGTAAGAGCTCGGTA                   |
| pGL3_P3_7949_F          | GCATGCAGCCCCTGTCAC                   |
| pGL3_P3_7949_R          | ACGCGTAAGAGCTCGGTAC                  |
| Point mutations         |                                      |
| pGL3_P3_8734_STAT3mut_F | GCTGTTTTTTCCTTTGGAGGATGGGGAG         |
| pGL3_P3_8734_STAT3mut_R | CCTCCAGACTGCCTCATA                   |
| pGL3_P3_8734_IRF1mut_F  | CAAGGAAGTATTCCCAAAGACAGGCAG          |
| pGL3_P3_8734_IRF1mut_R  | TTTTTCTTAAACATGTACTGAG               |
| pGL3_P2_RELA_mut_F      | GTTTCTGCCCTGTTCTGTTTCTC              |
| pGL3_P2_RELA_mut_R      | TCAAACAGTGTTCTTCTGTACAATG            |
| pGL3_P3_8734_NFKB1-1_F  | ATGGAGGATGAAACGTTTTCCATATCAAAGG      |
| pGL3_P3_8734_NFKB1-1_R  | TCCAAAAACAGCCCTCC                    |
| pGL3_P3_8734_NFKB1-2_F  | TCATGCAGATAAAAACCTGTAACTGGG          |
| pGL3_P3_8734_NFKB1-2_R  | CCTCTCTTGGTTTCTCCTG                  |
| pGL3_P3_8734_STAT3-2_F  | TTTTTGTTTCGCCCTTCGGGATCAAATGGC       |
| pGL3_P3_8734_STAT3-2_R  | GGCAGAGGTGATAATAGC                   |
| pGL3_P3_8734_PAX5_F     | ACCAAGAGAGAAACTGCAGATTTTCCC          |
| pGL3_P3_8734_PAX5_R     | TTCTCCTGTCCCAAATC                    |
| pGL3_P3_8252_p53_F      | CTGCTGCTGGCCTAAACTTAGTAG             |
| pGL3_P3_8252_p53_R      | GGGCCAATAGTTTCAGTCCTGGCG             |
| pGL3_P3_8252_CEBP_F     | AACATGACTCCCTGCCCTGTTCTG             |
| pGL3_P3_8252_CEBP_R     | TGTATATTCTATACATGTCTGGAATCTATGAATAAC |

**Supplementary Table 3: EMSA oligonucleotides**

| <b>Oligo name</b>         | <b>Sequence 5'-&gt;3'</b>             | <b>5'end modification</b> |
|---------------------------|---------------------------------------|---------------------------|
| IRF1-F-5'biotin           | AAAACAAGGAAGTAAAACCAAAGACAG           | biotin                    |
| IRF1-F-unlabeled          | AAAACAAGGAAGTAAAACCAAAGACAG           | -                         |
| IRF1-R-unlabeled          | CTGTCTTTGGTTTTACTTCCTTGTTTT           | -                         |
| IRF1mut-F-5'biotin        | AAAACAAGGAAGT <u>ATTC</u> CCCAAAGACAG | biotin                    |
| SPI1/IRF1 mut-F-unlabeled | AAAACAAGT <u>CCG</u> TAAAACCAAAGACAG  | -                         |
| SPI1/IRF1 mut-R-unlabeled | CTGTCTTTGGTTTT <u>ACGG</u> ACTTGTTTT  | -                         |
| STAT3-F-5'biotin          | GGGCTGTTTTTTTGGGAATGGAGGATG           | biotin                    |
| STAT3-F-unlabeled         | GGGCTGTTTTTTTGGGAATGGAGGATG           | -                         |
| STAT3-R-unlabeled         | CATCCTCCATTCCAAAAAACAGCCC             | -                         |
| STAT3mut-F-5'biotin       | GGGCTGTTTTTTT <u>CCTTT</u> GGAGGATG   | biotin                    |
| STAT3mut-F-unlabeled      | GGGCTGTTTTTTT <u>CCTTT</u> GGAGGATG   | -                         |
| STAT3mut-R-unlabeled      | CATCCTCCAAAGGAAAAAACAGCCC             | -                         |
| RELA-F-5'biotin           | GAACACTGTAAAACCCCCTGCCCTG             | biotin                    |
| RELA-F-unlabeled          | GAACACTGTAAAACCCCCTGCCCTG             | -                         |
| RELA-R-unlabeled          | CAGGGCAGGGGGTTTTACAGTG TTC            | -                         |
| RELAmut-F-5'biotin        | GAACACTGTTT <u>GAGTTT</u> CTGCCCTG    | biotin                    |
| RELAmut-F-unlabeled       | GAACACTGTTT <u>GAGTTT</u> CTGCCCTG    | -                         |
| RELAmut-R-unlabeled       | CAGGGCAGAACTCAAACAGTG TTC             | -                         |

**Supplementary Table 4: EMSA antibodies**

| <b>Target</b>  | <b>Antibody</b>                                                      | <b>Quantity in assay<br/>(<math>\mu\text{g}</math>)</b> |
|----------------|----------------------------------------------------------------------|---------------------------------------------------------|
| IRF1           | IRF1 E4 X sc-514544 (Santa Cruz, California)                         | 1 $\mu\text{g}$                                         |
| STAT3          | STAT3 polyclonal antibody (ProteinTech, Illinois)                    | 0.5 $\mu\text{g}$                                       |
| NF-kB<br>(p65) | NF-kB p65 D14E12 XP® (Cell Signaling Technologies,<br>Massachusetts) | 0.5 $\mu\text{g}$                                       |

## Supplementary Data 1

**UGT2B17 gene locus** (GRCh37/hg19 chr4:69,448,292-69,433,471)

**Note that UGT2B17 gene locus is located on the reverse strand.**

Genomic sequence up to exon 1 is provided.

Exon 1d

Exon 1c

Exon 1b

Exon 1

The sequence is annotated to indicate positions of chromatin features shown in Figure 1F.

Coordinates are given relative to the translational start site (+1-ATG codon)

Red labeled nucleotides indicate sequence discrepancies between GRCh37/hg19 and material derived from human cancer cells used in this study.

```
TCAGGTCACCTGGAGTTGTGTACCTAGGTGGATTTTGGCTGCCTCTGCTGAGTCATGAGGTCGTCAGGGAAGTGTGGGA
AAGCCAGCAGTCTCAGTTCTAACCCACCTCCCATGCACACTGAAGGGCCACTCCCCTCCACCGTGGCCCCGCAAT
AGTCCCGAGTCTTTTCAAGGAGGAGGAGAGTTGGACTTGAATATTTGCCTGAGATTTTCCACCTCCAGCTGCAAA
GAAAAGGGCTTTAGTTCTTCCCTGCTGTGAAGTCTGCAAGCTAGATTTCATGCCCTCCCCAATTTCTGGCCATGAG
GCTTCTTGGCTGTTCAAATTTGTACAAAGTTCAAGTACAGGAGTCCCTCTACTGTGGAGTTTACCCCTTGTAAATGTT
CTTGTATCGGTTCAAACCTGAGAGCATGCCAACAGAAACCACGAGGTGGTGTGGAGCAACATGCTGTTTTAATGAGC
ACCTGGGTGCAGGTGGGCTAGGGCCTAAAGGGGCGTCAGCCCCAAGTGAGGATGGGACAGGGTTTTGTAGTCCTCTG
TAAACAGTAAGTGTCCAGTCTGATGTGACTGCTATGTAGTACCAGACGGTCTCTTTCTTGTATCTTCAGGGGTATGT
GTCTTCCAGCCAAGGTAGGTGTCTCCAGTTGGCTCTCTCCTGCTTCTGCTATCTTTCTGATGCAAGCTGTTGACAC
AAATGGCTTTGCATCTTGGAACTGGGCTGAGAGGAGGAGTTACTCATCCCTTCAAGCTTTCAAGCCCCAGGGAGAAT
CTTCTGTATTATTTGGTTATAGAATAAAGGGAAAAGGGGTGACTTCTCAGTAACACTTCCAGGCATGACACAGGGAT
TGGAGTGGGCACCTTGGAAAAAAAATAAATTTTGGGGTATTCTTGAGAGACAGGTTGGTATCCACCATGTCGCT
GTAGCAGGAGCACCATCTGTATTGTCTGGAAACATGTCTGTGCCTGCAAGTCAGTTATGTTGAGAGGACCAGGAGGTG
TCGACAGGGAGAGGCATGGCTCATTGCTGCTTCACAAATGAAAGACCATGTCTGGATTAAGGAGGGGTGGTAATTTT
TGAGTGGCTCAGAGTCTGGTAAGGGTGGAGGCCCAAGACAAAATTTGGTTCATACATGATTTCAAAGGGACTATAAA
AAGAGTGTCTTTTGGTGTGTGCAAAAGTCTTATGAGGGCGAAAAGGGAGATTTTTTTTGTCCACGACTGTTGGGTTC
TACAGCCAGCTTGGTGAAGTTGGCTTTAAAGACAGAGTTAATTTTCTAACTTCGCTGAAGATTGAGGCCTGTAGGG
TGTGTGGAGAGCTTACTTTATCTTAAAGGATGTAGAGATGCCTCGGGTAAATTTGGCTGATGAAGGCAGGACTGTTATC
AGACTGGATGGATGTTGGGAGTCCAAAACGGGGAATTGCAGGTATGCATGATGAGTTTGTGCGATGACAGTTGCACCT
TCTGAAGTTGTTGGGAATTTCTTACTACCCAGAGAAAGTACAGACAAGGACTAGAAGACTTGTCTTATGACAGGAG
TATTGTTTGCAGTTAGGAAAACCCCGTTCTTTCCAGATGGATGAGTGTGAGTGCACACTACGTGGAGCGCATAATGAGAA
TTGAATAAATGATCTGTTTTCCGGATGCTAGAGTGAAGTGGAGTGGAGGCATTGAATTCAGCTTTTTTGGGAGGTG
GTCCCTAAGAGGAGCGGATTGGCTTCAATAGTGTGGGGGTGACACTATAGCATAGCCCCCATGTCAGTGTCTCTTGA
TGTAGGAAGGAGCTGCCATGTACAAACCAAATAAAGGAGGCATCTGGAAGGGATTGGTCTGTTAGGTATGGAAAAGGT
ATAAGAAAAGTTTGAACAGTATTACACAGAAAGAGTGTAGAGTCTTGGCAGTTGTAGCTTCAAGTAAGAGCATGGAC
AGGTTTAGATGGGAGGTGGTTAGCATGGTGTGTTGGGAGTTTCTATGAATAGAGCATAACAGCTGGAGGAGCCGTGGG
GCAGAGAAAAGACTTAGTACACTGCGGTGAGCTAACATGTCTTTGATGTTATGGGTTGAATAAACTGTTAGGTTGGCA
TGAAGAGATAGTATTAGGCTTTTAAAGAGTGAAGGAGAGAGCTGCCACCAATGCTCAGGGGCAGGCAGGCCATCCAAGA
ACTGTGGTCTCAAGCTCTTTAGGGAGGTAGGCAACAACCTGGCCGGGTGGGCCCTTAGACTGGGTTAGAACACCTAG
TGCAACTCCACGCCATTTCATCAGTATAAAGGGAGAAAAGGTTTGGTGAAGTCTGGGAGAGTGGATGGGGGCTGAGAT
GAGAGACTTTTGGAGTAGATGAAAAGGTTGGGTAATAGGCTGTGCAGGTTTAAAGGCTCATAGAGAGGGACTTTAAC
AGCTTCGTATAAATTTTGGCAAGTAAAGCGAAGGAGGAAAACCCAGAGCTAAAATATCCCGTAATCCTGAAAAGA
GAGAATTTCTGCTTAGTTTGTGGAGGCGGGAGGACTGAAGGAGGGAATATGTTGCTGTTGTGAGCCCTTGCCTT
AGGAGTGAAGCTAGCCCTAGATAGGTGACTGGGGGTGCATATTTGGGCTTCTTAGGGGAGACCTGATACCCCTGT
TCTGCCAAGAGGTTTAAAGAGAGATAGTATGTATGGGTGTTGCAGTCTCTTTGAGAGGGCTACACAGGAGCAGATT
ATTAACATATTAAGAAGAGAGGATGATTTTAGGGATAAAGTACAGAAGTTACTAGCAAGGGCCTGTCCAAAAGGTTG
GGGCTGTCTTAAACCTTGAAGTAGTACACACGAGGTGAGCTGACCTGAAAGGTTGGGTGTCGGGGTCTCCAGGT
AAAGGCAAGAGATTTTGGGAATCAGGGTGTAAAGGAAATTTGAAAAGCATCATTTAGGTTTAGAACAGAAAATGG
GTGGTATTCGAGGGAAGTGAAGAAAGTAAAGTATATGGGTAGAAACTCTGGACACACTGGGAGTACAGCTTGGTTA
ATGAGCCTGAGGTCCTGGACTAAGTGATAAGTTCCATCTGGCTTTTAAACAGGTAGAACTGATGTGTTAAAGGAGAG
TTTGTGGGCAGAGTAGGTGACTGGTGAAGGAGAGAAAATGATAGGCTTTAGGCTATGAGAGCTGCTTGGGGATG
```

Commentaire [MR1]: -13709: First nucleotide of HERVH48-int

Commentaire [MR2]: -13562: First nucleotide of exon 1d

Commentaire [MR3]: -13454: Last nucleotide of exon 1d

AGATACTGCTTCTGTGATAGGAACGGGGTGGGCTCTTTAAGGGTGATGTGGATGGGGGTGTGGTCTCTGTGACCGAG  
GGTGTGGAAGTATCCCAAACAGTGGGGTTAACTACAGGTGCGGGGATAAGGAAAAGTTGCATGCTTCAGGGTGGGAGGT  
CGGAGGAGTAGAAGAAAGTTAGAAGCCTGTTAGAAGCCTTGGAGGGTCTGGGTTGATGTGTGGGTACTATGGGGAA  
TGTGGAAGTGGAGAGTAGTGTGGAGTTTGAAGAATACTCTGCTTAGGAGCAGAGCTGGGCATGAAGGCAGGACTA  
AGAAAGAGTGAAGGAAAAGGTGTGCAGGGAGCAGAAAAGTGGAGGGGGTCTTGGGGTTGGAGACTTGTCCAT  
TGATTTCCCAACAGAGACTTGGGAGGACTGGGTGGTCTGAAAATTTAGGTAAAAGCAGAGTAGGTTGCCCAATAT  
TAATTAATAAAAAAAAAATACTGGCCTATCTGCCAACATCAAGGTTATCCTTGGCTCAGATGAAGCAATGGTAGTTGCTGG  
GGCATCTGTTCCAGGGCAGTGTGAGTCTTCCAGCGCAAGGCTGATGAGATCCTAGTAGGAGGTTTTGGCCGGCTGGGG  
CAGGGATGGGGGGCGTCTTGTCTGGGGCACCTCACAGTCTGACTTCCAGTGGGGTCTCCGCAGAGAGGGCACAGCCT  
GGTGGGCTTACCTGGGTTGGGCATTGCCTGGACCAGTGGCCTTATTGCCACACTGAAACAGGTGCCAGGGGGAGG  
TGGATTGCTAGGAGGCATCTGTGTGGAGCTGCACCTGTGGCCTGCAGGGCCCGTGGTGGAGGCAAGCATTTGA  
AACTCTGTCTTTTTTTTTTTCTTTTACTTTCCTCGTTATAACTGTTAAAGACTTTGAAGACTAAATTAAGAAGGTGT  
CATTGTGGGGTTTCCAGGGCATTGTCAAGCTTCTGAATCTTGCACCAAAATATCAGGGGTAGATTGGATGAGGAACCAA  
AGGTTTAAAAATAGTATTCTTCTGGGTTGGCTGGGTCTAGGTTGGTATATTTTCTCATGGCTTCAAGTAAACAAGAG  
AGAAAAAAGGCTGGGTTTCTGTGAGGACCTTGGGTGATTTCTGAAAGGTTTTATAGTTTTACCATTATGGGCACCC  
TTTTTGAGTCTGCAAGGAGATACGCAATCATGTGGTCTTGATGGCAGTGTCCAGAGGCCCTGTCTTGATAATCTGG  
TGGGGCTCCTGGTTGGGACTGCCTCCGTGCCAGTAGGCTGGGCAGGAGCTTGATGATGAATGTATTAGCATGCTCC  
TGAACCAGGGTCAAATATGGTCCCTGTCTTCTGGGGTGGGGTGAAGAGAGGATAAGTAGAAGGTGAGGGTGGAA  
ACAGGATAAGTAGAGGTGATACACAGGTTAGTGCATAAGACTGGGTAAGTACTGAACTCCCTAAATAAAGAGGTAGG  
GTCTTCTGGAAATGAATGACTGACTTGTGTAGTTTGGAGAGATCAGTGAAGGAGAAGGAAACATGAACCTTAAACAATACCT  
TCAGTTCTCTGCTACTTCTTGAAGGGGGCATTCTAGCACCCGCACTGAAGTATGGGTGCAGCGTGGGCCAAAGATGGTG  
CCCAAGCTGGTATGGACAGGAGAGAAGAAAGAACCCAGAGGGGTTCTGTCTGAGGGTTTGAAGGGGGAAGGCGGGTT  
GAGTTGACAGGCAGTGGAGGATACATAGGGGTGTAAGGTGGCTTGATGGGTTTACAGGCTTCCAGGAGAGGGCAGTGAG  
GAAGGAGACTGAGTACAGGCAATGCTAGAGTTTTCTGAGGAGAGGACGGTGTAGAAAAAGAGTGGGTACTTTTGGAG  
GGTGATGCGCGCTGGGAAGATGGTGGCTGGGAAGATGGTGACTGCGAAGACAATGAGAAAGCTTGGGGAGTTATAGAA  
GATGGTTGAGACGTGGGGTAGGGCTGGGAGGGTGGACAGCAGTCTGCCGATCCAACAAGGAAAAAGAGGTAGGG  
TCAGGAGGAGAAAGGTTATGAGGGTGGTGGAGATGAAGGATTTGAACAGGTAAGCAAGAATTCGAGAAGTCAAGTTGT  
GATCTGAGTGCAAAAAGGCTGGAACAAGGAATTTCTCCCATTTTTCCAGTCACTCGGCAATAATGCTTTAACCAGT  
TAAAATTTGAAAAGTCAAGTGTTCATTTGCTGGCCATTGGACCCGTTATCTAATTCATACTCGCGCCAGGTTTTTATT  
GTATAAAAAAGACAAGGCGCTTAGGGTGGGTATCTTGCCTGAGGCCAAGTTTGCAGATTTTTTATGAGGCAGTCTG  
GAGGGCTGTTTTTTTGAAGTGGAGGATGGGAGTTTTCCATATCAAAGGGTAGGCTCTGGAGAACAGGGAAAAAGAAGA  
CTGCTCTGGACAGCTGGAGGAAGACAATAAAAGGAGCTATTATCACTCTGCCTTTTTGGTTCCTGGAACGGATCAA  
ATGGCTTAGAGGCAATCCCCCTAAGACCAGATGATCAGGAGTGCCTGGCACATACTGGAGCCTTCTTGGATCAGTGT  
GGATTTTGGGACAGAGAAACCAAGAGAGGTATGCAGATTTTTCCCTGTTAACTGGGCTCCAGGGGAGCCTAACAG  
TAGGCGAGATCAGTGACCAATGTGCATGTGAAGGAAGAGAAAGACCTTCTCATATATTTTATTTGTTTTTCACTCA  
GTACATGTTTTAAGAAAAAACAAGGAAGTAAACCAGAGACAGGCAGCCAAACGCCAGGACTGAAACTATACCTG  
GGCCTGCCTGGCTTAACTTAGTAGTTAAACTCAACTCATAACTTAGAAACCAATGTTATTATAGATTTCCAGACAT  
GTATAGAAGAACAATGTGAAACTCCCTGCCCTGTTCTGTTCTCTGACCACAGTGCATGCAGCCCTGTCCACATA  
CCCAGTGTCTCAAAATCAATCACGACCCCTTTCATGTGAAATCTTTAGTGTAGTGAGCCCTTAAAAAGGACAGAAAAT  
TGTGCACCTCGGGGAGCTCAGATTTAAGGCAGTATCTTGCCAAATGTTCCAGCTGAATAAAGCCCTTCTCTACAAC  
TCGATGCTGAGAGGTTTTGTCTGTGGCTCGTCTGTACTATTTCTTGGCTCCCTGACCCAGAAGCAAGGTGACTGAC  
GGAAGGCTGAGGCAGCCCTTAGGTGGCTTAAGCCTGCCCTGTGGAGCATCCCTGTGGGTAAGTCCGGGCAGCCTGAG  
TGACGAGATCCAAAGAGCGCTCCTGGGTACGAAATTGCCCCAGTGAACACCTCACCAGATCAACACGTAGCAGGCC  
CCGTGGAGGATTAACACATTTGGCTGAACCCGGGAAGGAACTGGCACTTGGAGTCTGGACATCTGGAACCTTGGTAAGA  
CTAGTCTTTTGAATCTGTCCACTCCACTGAGTAGAAGCATGGCTGGTCAACCAGGTTGCTGCTGTTGGCACCT  
TTGTTCTGGTTTTGACTTGGCTAGACTTGGTAGGACTAGTCTTTTGAACCTGCCCCACTCCACTGAAATGGAAGTGT  
GCATAGCCTGATCACCACCGTGTGCTGTATTGGCACTTTTGTACTGGTTTTGACTTGAATTTGCTGGATACT  
TTGGTTTTGGTTTTGACCTGGCTTGGATTTCTGGATACTCTGATTTTGGTTTTGATTTTGGTTTTGGTGAACCTGAA  
ATGTTTTGTGTGCCCTTTTACCCTTCTTTGTTTTGTTGGTGTGTGTGTGTGTGTGATGGTGTGTTTTGCTCAAAAA  
AACATAGATCAGGCACAAAGTAAGCCCACTGCCTGGAACTATGATAATGAATTTCAAGAAAGGATTAAATAGAGAC  
TATGGAGTCACTATGACTCCAGGAAACTTAGAACTTTGTTGTGAAATAGATTGGCCAGCATAGAGGTAGGTTAGCCA  
TCAGAAGGAAGCCTAGATAGGCTTTTTAGTTTTCTAAGGATGGCACAAAGTAACTGTGAAGCAAGGACCCAGACC  
AGGTTCTGTACATAGACAGTTACAGCTGGTTTTAGCCCTTCCCCCAACCCCTCACAATAGTTAAGAGAACAGC  
AGCATAAGCAGCTGGCAGAGGCAAGGAAAGACCAGCAGAGAAAAAAGGCCATCTATACCAATTTCTAAGTA  
AATTTAGACTAAACAGGCTTATTAATAGCAAAGGATAATTGAAATTTCAAACCTTACAAGTTTTCAACAAAAGCGA  
AGTTTGTCTAAAAGTTGACAGTGAACACATATATGGTAACTTCTAATCTTGTGGCCTTAGACAGTCTAGTCCAAAGA  
CATAAAGAAAGTTCACTTTTTAAAAAAGGAATGGTTATCTTCAAAAAAAGGGGGGGAGGAGGTAAAAATTTAT

- Commentaire [MR4]:** -9471 to -9039: CTCF bound region
- Commentaire [MR5]:** -8544 to -8534: STAT3 binding site
- Commentaire [MR6]:** -8374: First nucleotide of ATAC-seq peak (Rendeiro et al)
- Commentaire [MR7]:** -8212: First nucleotide of Harlequin-int
- Commentaire [MR8]:** -8209: First nucleotide of POL2A bound region at exon 1c
- Commentaire [MR9]:** -8153: First nucleotide of DNase1 hypersensitive region #1
- Commentaire [MR10]:** -8137 to -8126: IRF1 binding site
- Commentaire [MR11]:** -7949: First nucleotide of exon 1c according to RNA-seq of MEC1 cells (Allain et al, Front. Oncol 2019)
- Commentaire [MR12]:** -7879: Last nucleotide of DNase hypersensitive region #1.
- Commentaire [MR13]:** -7838: First nucleotide of exon 1c in NM\_001077.4
- Commentaire [MR14]:** -7466: Last nucleotide of exon 1c
- Commentaire [MR15]:** -7448: First nucleotide of DNase hypersensitive region #2
- Commentaire [MR16]:** -7364: Last nucleotide of Harlequin-int
- Commentaire [MR17]:** -7358: First nucleotide of Harlequin-int
- Commentaire [MR18]:** -7284: Last nucleotide of DNase hypersensitive region #2
- Commentaire [MR19]:** -7179: Last nucleotide of POL2A bound region at exon 1c
- Commentaire [MR20]:** -7146: Last nucleotide of ATAC-seq peak (Rendeiro et al, Nat Comm 2016)

GTAAAAAGAGTGTTATATGGTAAATTTCTGTCTGAAAATAAATTAACCTGTTGTTTAAAGAGAAGAAAAAATGTTTG  
TAATAAGTCAGAAAGTTGAGACATGTTGAAAAATGTTGGCGAAAAGTCGTGAAAAAAGTTATAAAAAATTTTATGCA  
AAAAATGTTGCATAATTTAAAAGTAATAAGGCCTCCTGAGTGCATTGAAGAAACAGTTTATGTGCAGGTGTATAAAA  
AAGTAAAAATATAACTTTAATGAGAAGATTATAAGGAGGCATAAGAATGTGGATTTTTACCTACATTA AAAAGTCAAAA  
AAGAATTATTGTTTGAAAAGTTCAAGCAAGTTTTAAAAATGTTAATTTAAAGAAAATCTGTGTGTAACCTTATTAGCT  
AAAGTTAAAAAAGTATTATCCAGTTTTCTGTGAACTAGACATGAAAGTAAAAATGCAACAGGTTTTTTCCTTAAAGC  
ATCAACCTGCTCTTTAACAAAAATTTGTAAGGTTAAACAGAGTCTATAAAAATCTTACCTTATGGTCAACTATGAAAA  
ATTGGATAAATATGTCTACAAGGTTTTATTAAAATTAAGTTTAAATTAATAACACACTAATATAAAAAGTAAAAATTTA  
GCTTATCTGGTATAAAAAATCATACAAGAAACATTAATATAAAAATGATGTTTAGCTTTCTTTGGTCTAAAAACTAATA  
AAAATTAGTGCTAATGGAAATATTCATTTTACTAGAGGATCATAAAAAGTTAAAGACTTAAAACAAACCTTTAGCAATTA  
AGACAGTATATCAAGCTACAAATGCCCTGGTTGAAATGGATCAAATATTCCAACCTACACAATAAACAAAAAGCAATTGTT  
ATGCTTGTGCACATGGCAGGCCAGAGGCCCTAATTGTCCCTTCCCACTACGGTGGTCTCCAGTTCCACCAGGTGTGG  
GCCTGATGTTAGCTCTTTCCAGGATTTCTACAGCCTGGAGTAATAAGTCAATGCCAAGCTCTCTGTCTATATCTGAA  
GTCCCTGCCAGTCAGCCCCAAGGGCCATCCAGCTTCTGTCTCAACACTAAGTTCACTTCTGTCTCTCACGGCAG  
GGAGGAACTTAGCATTCCTTTGGAGACCTAAAAGGATGCAGTGCAGCTTAAGAATTTCAAGAGCTTATCAATCAATCA  
GCCCTTGTTCATCCCTGAGCAGATGTGTGGTAGTATTGTGGTGGACCTTTACTAGGCACCTGCCAAAATAACTAGAGT  
GGCATTGTGCCTTAGTCCATTTGGCTATCCCTTTCACCCTGGCATTTCATCAACCAGAGGAAGGAAAAATAATAAT  
AACACATCGTAAAGTGAGAGGAGCCCTTATAAGTCTTTCAACTCTCACATCTATTAGATGCAATCGAAGCCCTGCA  
AGGAATACCAGATCAATTTAAGCTTGAATCAAATAGTTACAAGATTTAAGTCAATATTTTAGTAGATAACAGTCAA  
TAAAAATGTAGATTAGATAAACTACATCTATTACAACCAACAGCAAAAGAGCTTTTCATGAGTTAAAAA  
ACTCATGTGCGCCCCAGCCCTGAGGCTACCTGACCTGACAAAACCTTTCACACTCTATGTGTGAGAAAGAGAAAA  
TGGCAGTTGGAGTTTAAACCAGACTGGAGGTTCCCTGGCCAAGGCCAATGGCCTGTCTCTCAAACAACCTAGACGGGG  
TTTCCAAAGGCTGGCCCCATGTCCAAGGGCCCTGGCAGCAACAGCCCTGTTAACCAAGAAGCAAAATAAGCTAACT  
TTAGGAAAAACCTAAACATAAAGTCTCCCATGTGTGGTAATTTAATAAATACCAAAGGACATCATTAGCTAATAA  
ATGATAGACTAACTAGATACCAAAGCTTGCAATTGTGAAAATCCCCACATAACCATTGAAAGTTTGCACACCCTAAGCT  
CACTATCTTACTCTATTATCAGAGAGCCAGTTAACATAACTGTACATCAGTAGACTGGGAGCTGTACGTGGATGG  
GAGCAGCTTACCAATCCCTGCAAAAATGACTCTGAAGAGACAACAAACACTGCTCCAGTCAACCCAGAAGCTGACT  
GGTCCACGCATGGCTGAAGCATGAGGAGACTCATCGCAGGACTCATTTTCTCAGAATTTGGACTTGTACAGGAAGGA  
CTTCAACTGACCTTCTCAGACTAAGAACTGTTTCCAGTATATACATCAAGTCACTGAGGTGGAACAAAAGATTGCTA  
CAGTCTTACTTTATAGTTATTATAAAAAGAGCTAATTACTTTATGGTTATTATAAAAAGAGCTAATTGCCTTCCATG  
ATCAGCCCTCATAATCGTCTTTCTTATCAGCTTCTGGTTCTATATGCCCTCTTTCTAACACTCACAAACAACTGA  
CTAACACTAATATACGGGACCCCGAGGACTCTAAAAAATTAATAGCAACAAAAACAACAAATTTGTTTGTATA  
ATGCTATTCTATCCAAGGTATGTAGCCAGGAAATAACCAACCTGATGTGTGTTATGAACAATTTAAGCCTCCCATG  
ATCACAGTTTTTAAAATAAAATTAAGGACTGCTCCTTTTCTATGTGACACAAGTAAGGTAATAGGTAGAACCAGAAAA  
AACAGAGCTCCTCAAAAATGTAACCTTAAAATTTGACACTTGTGCCGCTATTAATAGTAAGCAGCATGAAAACAGGATGT  
GATTTCTCTAAATTA AAAAAGAAAGTTACACAGTAAAAAATAAGTATATCTGTCAAAAATCATATTTATGTGAGATG  
TGCAATACTGGTCTCGTGTCACTTCAAGACTTAAAAGGAAAAATAAAAAGATCGTGTTTGACTCCAAAAGGAAAA  
CTCAGCCCTCTTGATGAATAGGAGCTACAACCTTTTAGAATTGATAATCACAAACCCCTCAGACCCAAAGTAAAAT  
AAAAGAAAAATATATATCATTAGACATGGATAAAAAGGACTAGATCCTAATGTAAGCATCCTAATAAAAAGGAGGTT  
TCAAAAACGCTCTCCAGAACCAGTGTTCAGACTTCTATGATGAACTAAATGTGCCAGTACCTGAGATTCCAGGAAA  
AACTAAAAATTTCTTTTGCATTAGCCTAACACGTAGCCAGTCTCTACAAGTCACTCATATTATGTTTGTGGAGG  
AACCATACAGTAGATCAATGGCCATAGGAAGCCCAAGAATTAGTTCTACAGACCATTTCTGTGAAATCCCAGC  
CCAAAAGAATCACCTGATCATCTCTAGGTTCTAAAAGTCTCAATTATTAGACAGTATTGCATAGCTAAAGAAGGAAA  
AGGATTCACTCATCTGTAAGGCAGCTTAGCTGTCTTAGACAAAAGCTCTATAATAGTACCACAAAACAGTCAATG  
GTGGAGTTCCAATTACACAGAAAGAAATCCATTAGTAAATTTCCAAGTTGCAGACTGTTTGGGCCACCAGAAAT  
CCACTGGGACTGGACGGCCCCACCGGATTACTGGATATATGTGGACAAAAGCTTATGCTAAGCTGCCTGATCAG  
TAGACAGGTAGCTGTGTAATTCGCACCATTAAGCCTTCTTCTTCTTACTGCCATAAAAACATGAACCTTCTAGGCTT  
CCAGCTATGCTTCTGGGAAACAAAAAATGAAGCATAGCCATAGGAAAAGATGATAAATAGCCCCCTGAAAAAAT  
CATACAATACTATGGACCCACCACTTAGGCACAAGATGGCTCATGAGGATATTGGACCCCCATCTACATGCTCAACCG  
AATCATACGGTTACAGCTGTTTATAGAAATTTTACTAATAAAACCGGTCAAGCCTTGACCGTTCTTGCCCGCAAGA  
GACTCAGATGAGAAATGAATCTATCAAAAATAGACTAGCTCTTACTGACTGCTGACTAGCAGCTGAAGGAGGAGTTTGTGA  
AAAATTTAACCTTACTAATTTACTGTCTACACATAGATACTCAGGCAAGTTATTAAAGACATAGTTAAAAATATGACAA  
AACTGGCACATGTACTGTGCAAGTGTAGCAGGATTCAAACCTGAAGCCATGTTTATAGAAAGTGGTTCCAGCCTAG  
AAAAATTTAAAACCTTATAATAGGAGTTACAATAATTTAAAAAACCCTGCTTACTGCTCCCTGTTTGTACCTGTAC  
TTCTTCAAATGATAAAAAGCTTCTATCGCTACCTTAGTTCAACAAAATGCTTCAGCACAACCTGACTATATGAATCACT  
ATCAGTCTATTCCACAAAAGACATAAGTAAAAAATGAGTGAGAACTCCCACTAATAAAAAGTGAAGTCTCAAAAAG  
GGGGAATGAAGGAAGAGAAGGACCTCTCAGATTATTTTATATTGTTTATGCTCAGTACCTGTTTAAAGAAAAAC

**Commentaire [MR21]:** -2011: First nucleotide of ATAC-seq peak near exon 1b (Rendeiro et al, Nat Comm 2016)



AACAAAGAAGTAAAACCAAAGACAGGCAGCCTGGCTCCAGGCCCTGAAACCAGGCCCTGGGCCTGCCTGACCTAAACCCA  
 GTAGTTAAAAATCAACTCATAAATTAGAAACCAGTGTATTTCAGAGATTCCAGACATTTGTACAGAAGAACTGTAA  
 ACCCCCTGCCTGTCTGTTTCTCTGACCAGCAGTGCATGCAGCACCTGTCACATACCCACTGCTTAAATCA  
 ATCAGCACCATTTCATGTGAAATCTTTAGTGTGTGAGCCCTTAAAAAGGACAAAAATTGCGCACTTGAGGAGCTTGG  
 ATTTTAAGGCAGTAGCTTCCGATGCTCCAGCTGAATAAAGCCCTTCCTTCTACAACCTGGTGTCTGAGAAGTTTGT  
 TCTGTGGCTCATCCTGCTACACATGCACAGAGAGGCAACTGGAGGCTGAGGAGTTTCCCTTTGCTGGTTGCTGTGGCT  
 TGCTCTCTGGGGTGGAGGGTAGGTCCACAAGGGACACAGACCTGAGCCCCACCCAGGTTTTTGGCACCAGATATAAGG  
 TTCTTGAATTTGGTTGATCCCTGAGAGCATGCCAACAGACAACACGAGGCAGTGCAGGAGCAGCGTGTCTTTAATGA  
 GTGCTGGGTGCAGGTGGGCTGAGGCCATAAATGGCATCAGCCCCAAGTGAGGATGGGACAGTGGTTTTATAGTCTC  
 TGTAAAGAATAAGTGTCCCAATCTAAAGTGCCTGCTATGTAGTACTGGAATGGCCCTTTGACTTCAAGGTTTCATGT  
 CTCCAGCCAGCGTAGGTGTCTTCTGGCCGGCTCTCTTCTGCTTCTGCTATCCTTGGCTGACACACGCTGCTGATGCAAG  
 CAGCCTTGCATCTTGGGACTGGGCCTGAGAAGGGAGGAGTTACTCATCCCTTCAAGCTTTCAGGCCCCAGAAGAATCT  
 TTGAACCCCTGCTCCGCTGGCCACCTCCTAAAGGATCACTGTGGTGCCAGGCAGGAATGAGCTGCTTGGGTATCCA  
 GAGAGCTCCCACTACCTTTCTGCTACTTCCCTTACCCCTATATTTTGGTGGCTGGTCTCTAATTTGACTCAGCTT  
 CACATAAAGTCAGGAACTTCTCCTGCAACAGAACTTCAGCTTCTCCAGTGGGGATGTGTATCTGGAGAGGGGGATC  
 ACCCTTTCCCACTTCCATTGTTGGGGCACTCACAGTGTTTGGGATGTCTCCAGGTCCTGCAGGAGCAGTACGCTTCC  
 TGCAGAGGGTGTGTGGATCCTCTCAGAATTGCTGGTCTGCTCCTTGCAGTTGACCTGCAGCTAAAATTCACAATGCAAG  
 CCTCTGCATGCTGCTGCTGAGAGTGAATCTAGTCTGCATCCCATCTGCCATGATCACTGGAAAACCTCATT  
 ATTTTTAAAGGGTCCAGAAAATGCTAATCTATAGAGATAGAAATAGATTAGTGGTTGCCTAGGGTAGGATGGATGC  
 AAAATTTCCAGAGTGGGGGGTTAGAGGCTATTGTATAGAATCTTTTGGAGATAAATACTGATTATTGTAGTGAAAATAAA  
 ATTCTGTGAATATACTAGGAAACATTTGAAGTGTACACACTAATTTGGTGAGTCAATGGTATATGAATTATGTCTCAAC  
 AAAGTTTTAGAAGACATTACTTGCACCACGATATAAAAAATGGCGTTTGGAGTTGATAAATACTTCTCTCTATG  
 TCAAGGGCACCGAACAGGCAGGAGCCTCTCACCTGCCACTGTTCTTAACAGTATTATAAAAATAATTACATAAGACAGG  
 TTACTTACGTATTTAGTTCATAAAAATTTGCTTGGACTAGAGTAATGTAAATATAAAGAACACCAACCAACACACTA  
 AAATAAATATGAGGTCAACTCAAATTTAGCAGTTATATTTAACTTGATTGATTTTTCTCAGTATAAAGTATGAGA  
 AATGACAATAAGAAACAACAACCTGGAAGAGCTTGTTCAGAGGGGTGATGAGGTGATTGTGTTGACATCTTCGGCTTCTA  
 TGCTGATGCAGCTCAGTTGTTACTTTAGCTCTGGGAGTTGTGGAAAGGTGCTGGTGTGGCCACAGAAATACAGCCATT  
 GGATAAATATGAAGACAATCCTGGAAGAGCTTGTTCAGAGGGGTGATGAGGTGATTGTGTTGACATCTTCGGCTTCTA  
 TTCTTGTCAATGCCAGTAAATCATCTGCTATTTAAATTAGAAGTTTATCCTACATCTTAACTAAAAATGATTTGGAAG  
 ATTTTTTATGAAAATGTTTCGATAGATGGACATATAGTATTTCAAATAATACATTTGGTCAATTTTTTCAACTAC  
 AAGAAATGTTGGGAATATTTCTGACTATAATAAAGCTCTGTGAAGATGCAGTTTTGAACAAGAACTTATGAGAA  
 AACTACAAGAGTCAAATTTGATGCTCTTCTGGCAGATGCCGTTAATCCCTGTGGTGGAGCTGCTGGCTGAGCTACTTA  
 ACATACCCCTTCTGTACAGTCTCCGCTTCTCTGTTGGCTACACAGTTGAGAAGAATGGTGGAGGATTTCTGTTCCCTC  
 CTTCCTATGTACCTGTTGTTATGTGCAAAATTAAGTGATCAAATGATTTTCATGGAGAGGATAAAAAATATGATATATA  
 TGCTTTATTTTACTTTTGGTTTCAAGCATATGATCTGAAGAAGTGGGACCAGTTTTATAGTGAAGTTCTAGGTAAGT  
 CG

**Commentaire [MR22]:** -1853 to -1839: NF-kB binding site (Encode ChIP-seq data in GM12891 et GM19099 treated with TNFalpha) Site studied by luciferase assays in this study.

**Commentaire [MR23]:** -1609: last nucleotide of Harlequin-int

**Commentaire [MR24]:** -1512: First nucleotide of the POL2A bound region at exon 1b

**Commentaire [MR25]:** -1290: Last nucleotide of exon 1b in *UGT2B17\_n3*

**Commentaire [MR26]:** -1217: Last nucleotide of exon 1b in *UGT2B17\_n4*  
Exon 1b extends to nucleotide -1217 in *UGT2B17\_n4* (81 additional nucleotides that are not in *UGT2B17\_n3*)

**Commentaire [MR27]:** -1064: Last nucleotide of HERVH48-int

**Commentaire [MR28]:** -983: Last nucleotide of the POL2A bound region at exon 1b

**Commentaire [MR29]:** -828: Last nucleotide of ATAC-seq peak near exon 1b

**Commentaire [MR30]:** -902 to -619: CTCF bound region

**Commentaire [MR31]:** -158 to -147: FOXA1 binding site important for *UGT2B17* expression in the liver and prostate. The single nucleotide polymorphism known to influence hepatic expression of *UGT2B17* is underlined.

**Commentaire [MR32]:** -64: First nucleotide of exon 1 in *NM\_001077.4* and in *UGT2B17\_n2\_n3\_n4* transcripts

**Commentaire [MR33]:** *UGT2B17\_v1* transcript start site according to *NM\_001077.3* (NCBI RefSeq)

**Commentaire [MR34]:** +1 to +3: First codon

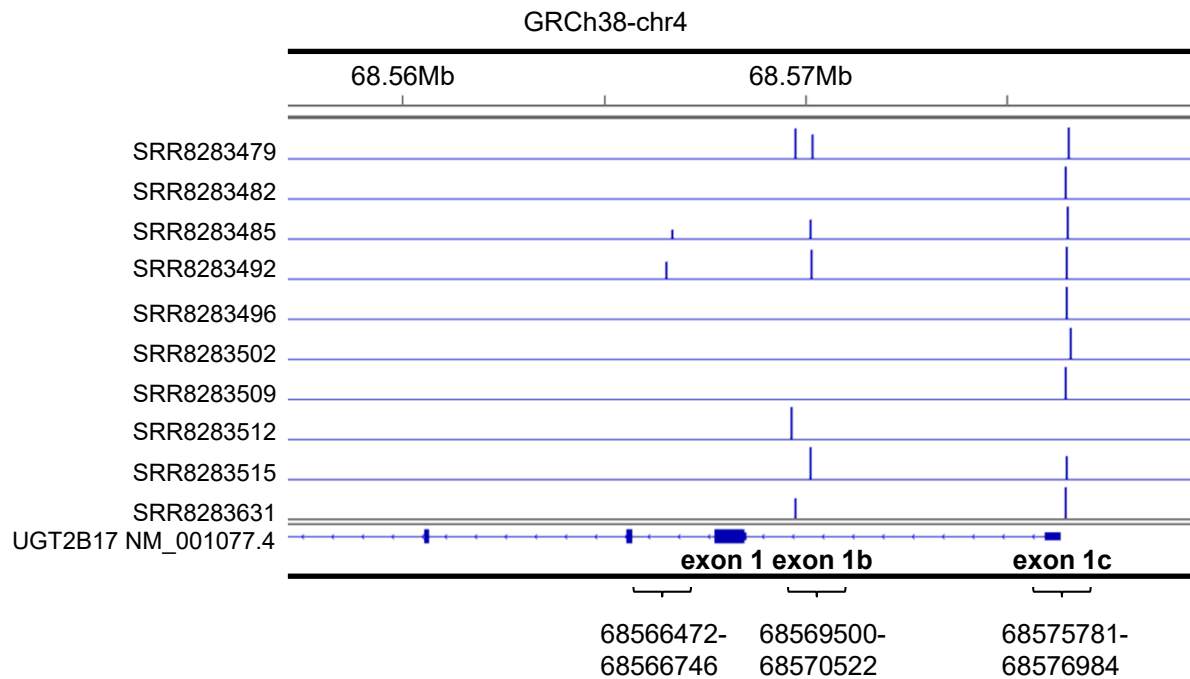

**Supplementary Figure 1. ATAC-seq signals at the *UGT2B17* gene locus in CLL cases from a previous study (19).** Ten of the 18 CLL samples in this study showed an ATAC-seq signal at the exon 1c and exon 1b of the *UGT2B17* gene locus. Coordinates of ATAC-seq signals on the GRCh38 chromosome 4 are provided. Note that the *UGT2B17* locus is on the reverse strand/orientation.

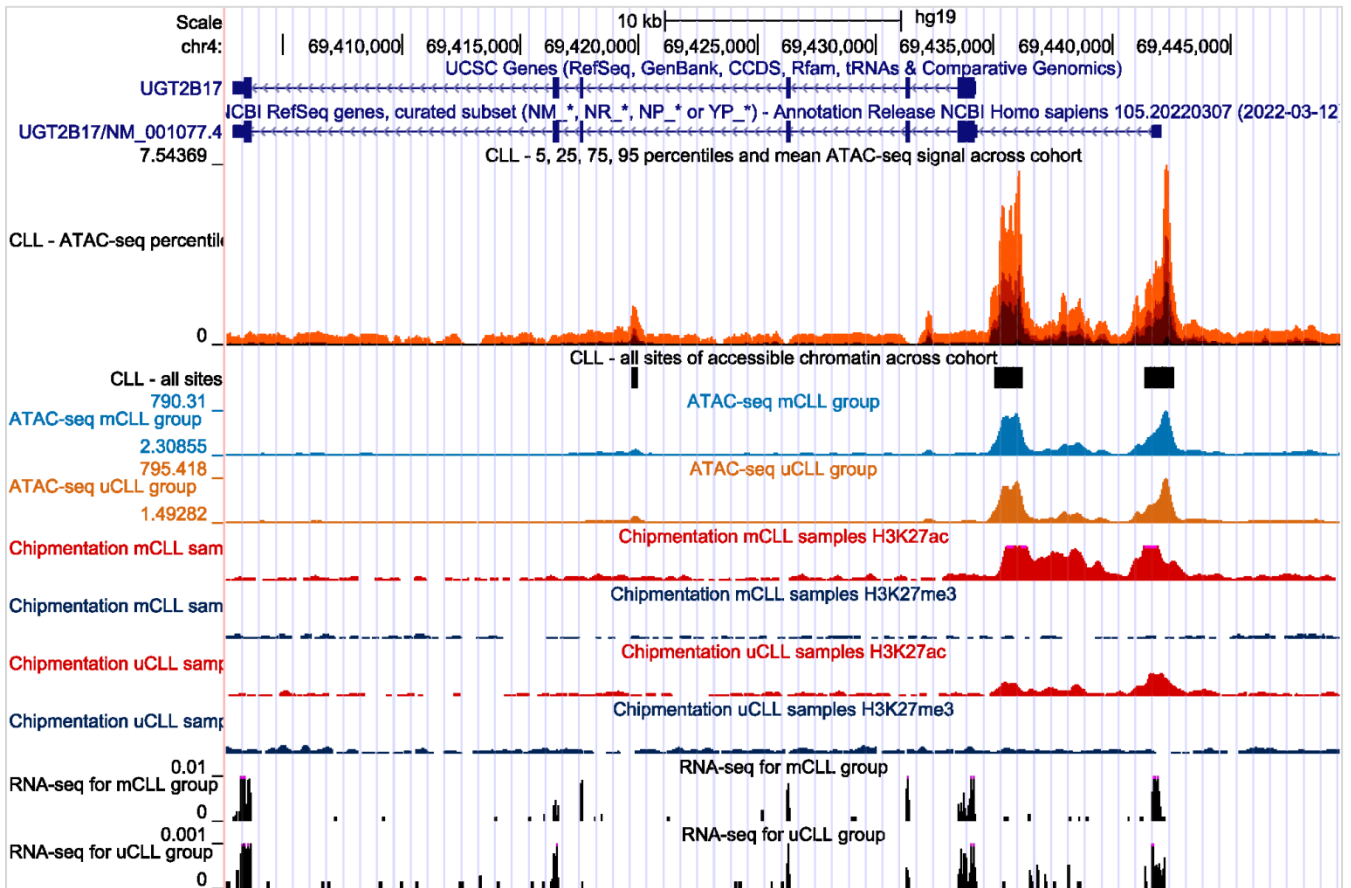

**Supplementary Figure 2. ATAC-seq and epigenetic marks at the *UGT2B17* gene locus in CLL cases from a previous study (16).** ATAC-seq signals in IGHV mutated (mCLL) and unmutated (uCLL) subgroups of CLL patients are detected near the exons 1c and 1b. Histone H3K27 acetylation (ac) signals, RNA-seq reads and absence of the repressive H3K27me3 signals are consistent with active transcription at exons 1c and 1b. Coordinates of the *UGT2B17* gene locus on the GRCh37 chromosome 4 are provided at the top. Note that the *UGT2B17* locus is on the reverse strand/orientation. Data were obtained from a previous study (16) and accessed on the UCSC Genome Browser as described in Materials and Methods.

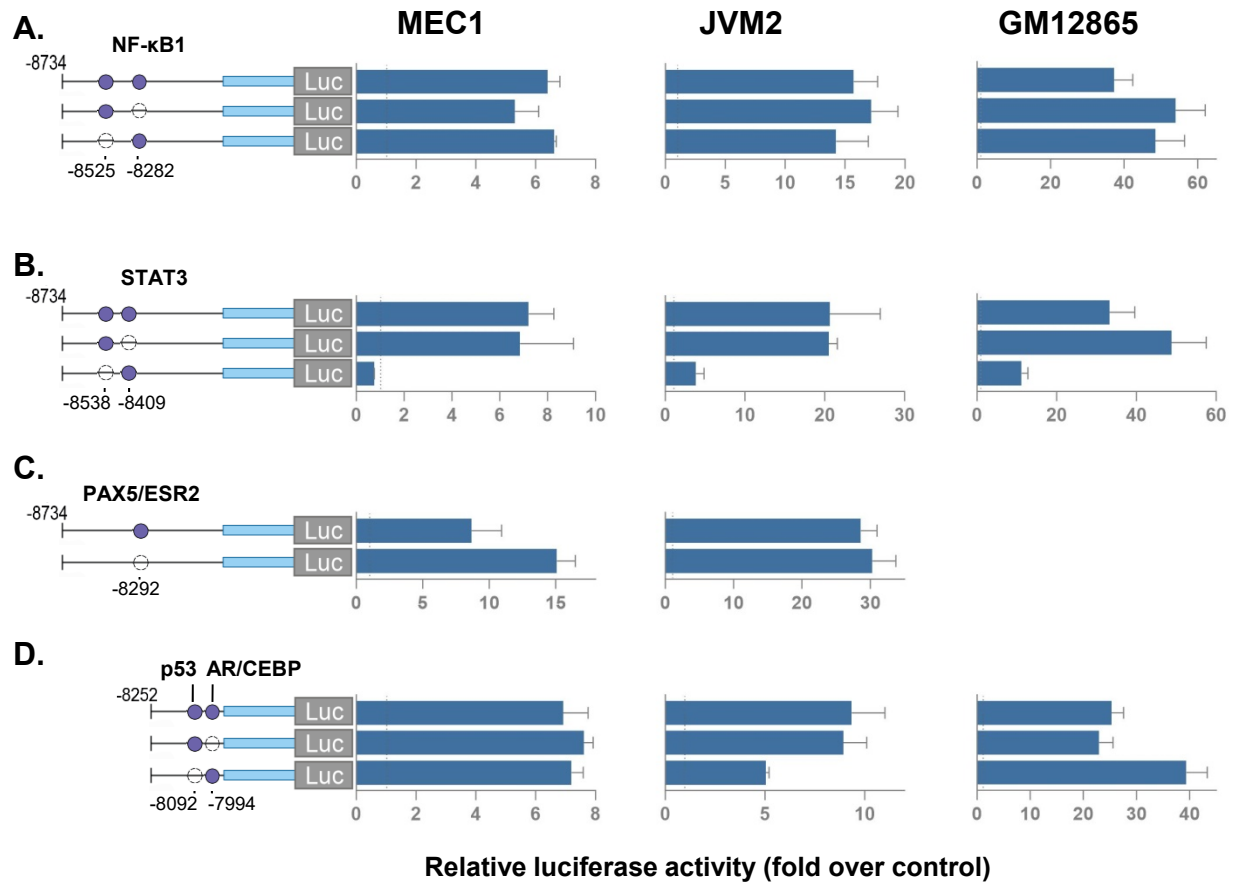

**Supplementary Figure 3. Evaluation of active cis-regulatory regions in the P3 promoter of *UGT2B17\_n2* transcript by luciferase assays and mutagenesis.** Transcription factor (TF) binding sites predicted by JASPAR in the P3 promoter are shown in Figure 2A. Luciferase (Luc) activity driven by the P3 promoter without (filled circles) or with (open circles) mutated TF binding sites is shown relative to the pGL3 empty vector (dashed line). These initial luciferase assays constituted a first screen to identify most active regulatory sequences. Assays were conducted once in triplicates. **A.** NF-κB1: nuclear factor kappa B subunit 1 (p105); **B.** STAT3: Signal transducer and activator of transcription 3. Note that mutagenesis of STAT3<sub>-8409</sub> also disrupted a BLC6 binding site. The regulatory STAT3<sub>-8538</sub> binding site studied further in this paper is shown as a positive control. **C.** PAX5: paired box 5. Mutagenesis of PAX5 also disrupted an ESR2 and RORA binding sites. **D.** p53: tumor protein p53; AR: androgen receptor; CEBP: CCAAT/enhancer binding protein. Mutagenesis of p53 also disrupted a IRF6 and ESR2 binding sites, and mutagenesis of CEBP also disrupted the AR binding site. Coordinates are relative to the *UGT2B17* translation start site (+1). Representations not drawn to scale.

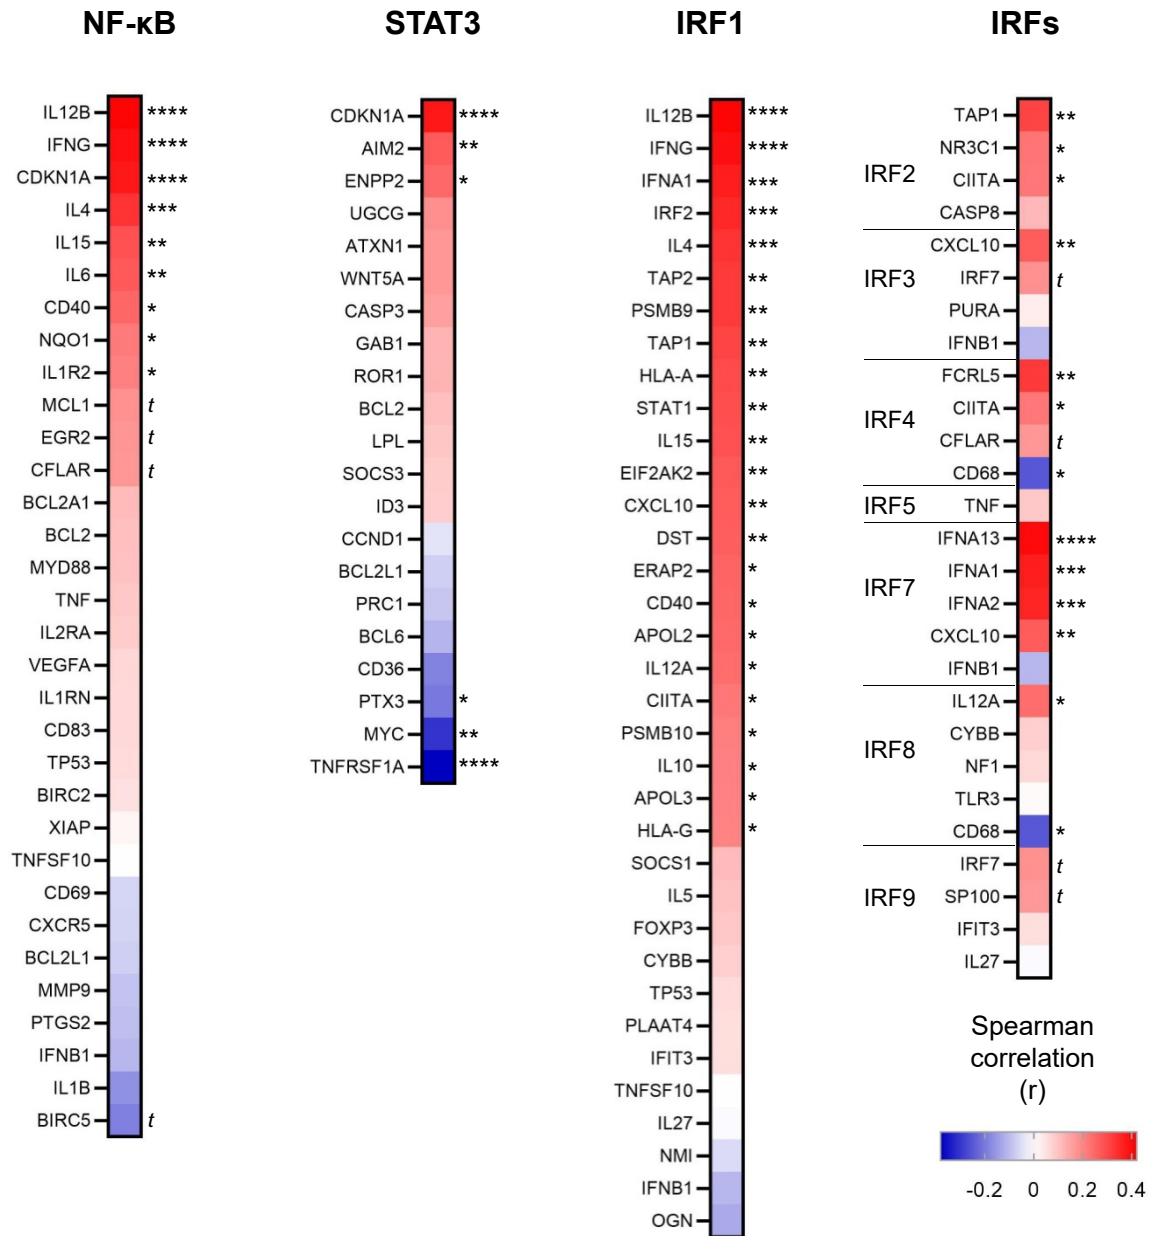

**Supplementary Figure 4. Spearman correlations between expression of NF-κB, STAT3 and IRF target genes and *UGT2B17* in the LL100 collection of lymphoma and leukemic cell models. \***,  $P \leq 0.05$ ; **\*\***,  $P \leq 0.01$ ; **\*\*\***,  $P \leq 0.001$ ; **\*\*\*\***,  $P \leq 0.0001$ ; *t*, trend.

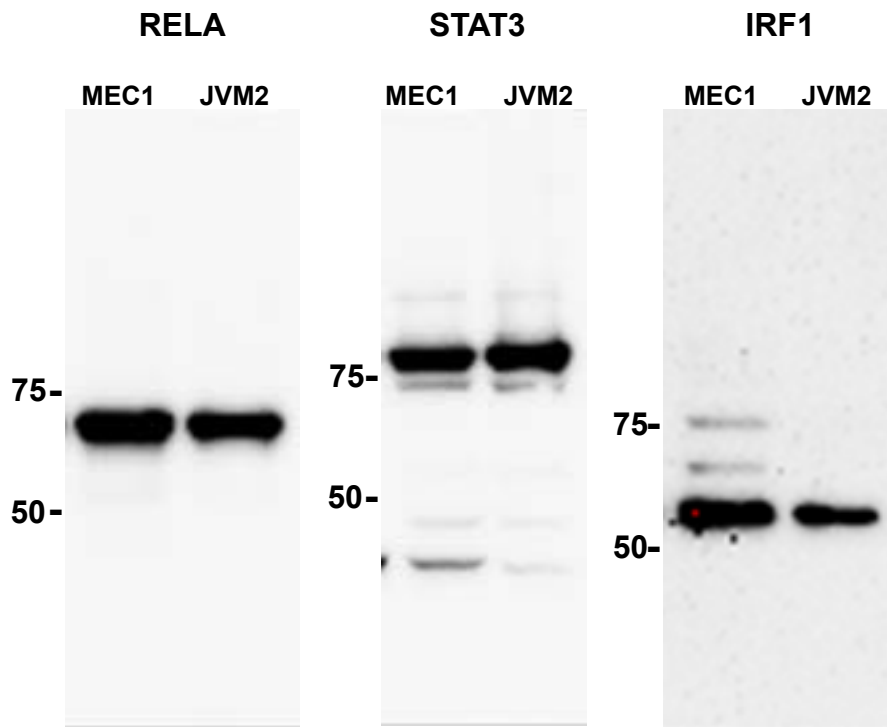

Supplementary Figure 5. Full blot images of immunoblots presented in Figure 3A.

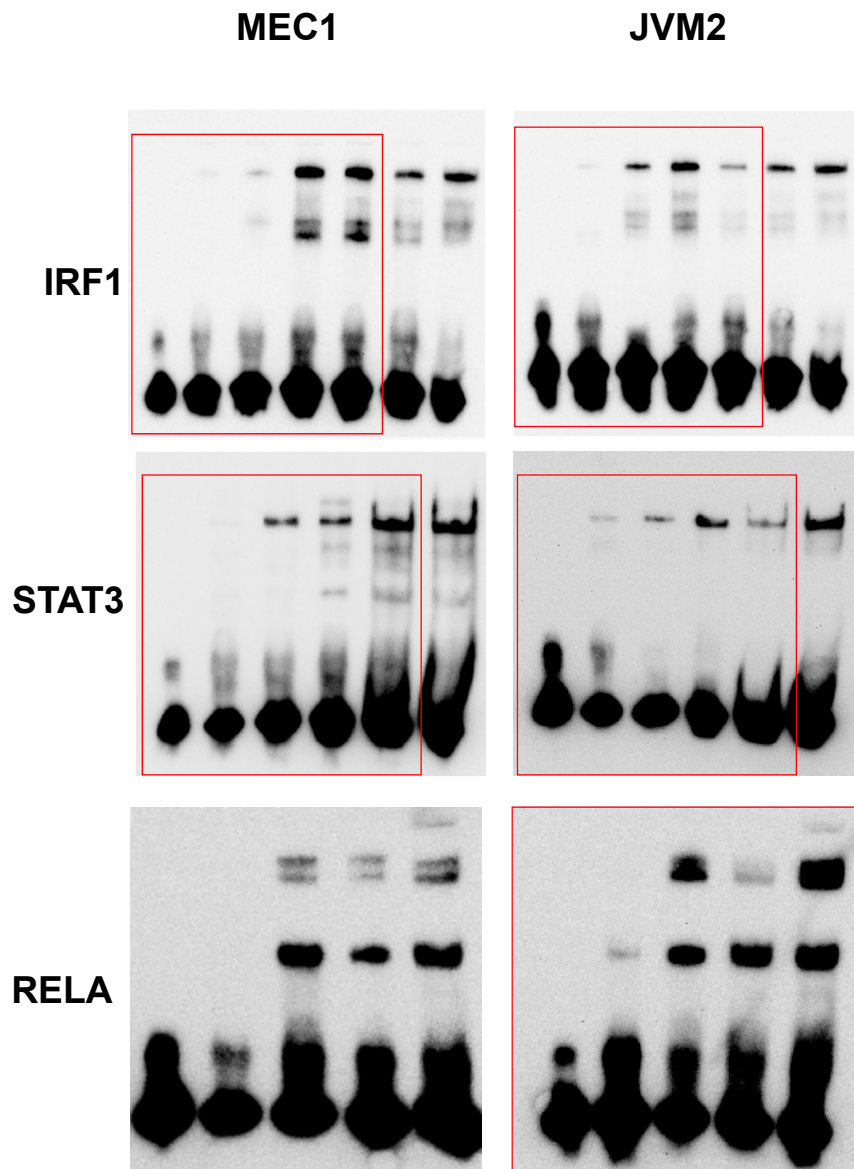

**Supplementary Figure 6. Full blot images of EMSA presented in Figure 3B.** Images presented are those of each full length membrane. The images shown in Fig.3B are delimited by red squares. Note that the signal for MEC1-RELA (bottom left blot) is complete. It appears incomplete on the lower right side due to a cropped membrane. The large amount of non-shifted probe produced a signal that was beyond the edges of the membrane.

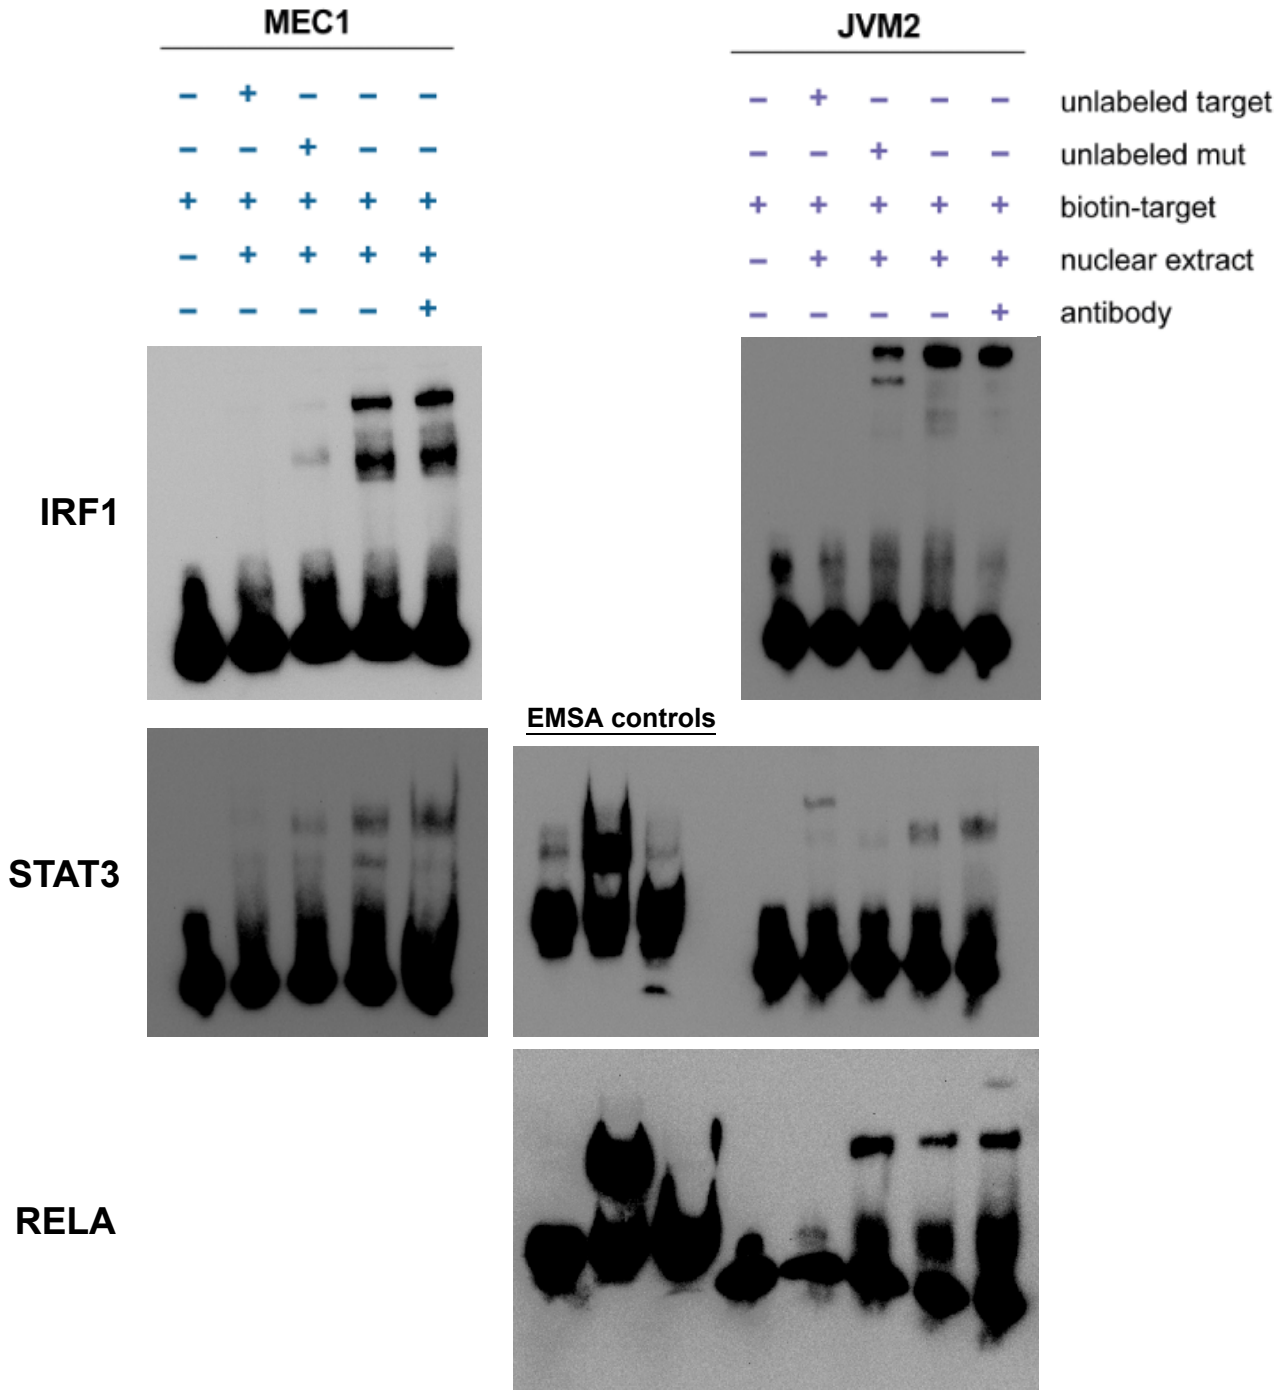

**Supplementary Figure 7. Full blot images of replicate EMSA experiments.** Images presented are those of each full length membrane. For JVM2 STAT3 and RELA EMSA, the 3 left lanes are control EMSA samples included in the EMSA kit and are unrelated to the MEC1 and JVM2 samples.
